# Supplementary material
Source: PubMed Central journal article supplement (PMC5666053)
Supplement: ajtr0009-4440-f7.pdf [file ajtr0009-4440-f7.pdf]

# NOX4 and gastric cancer

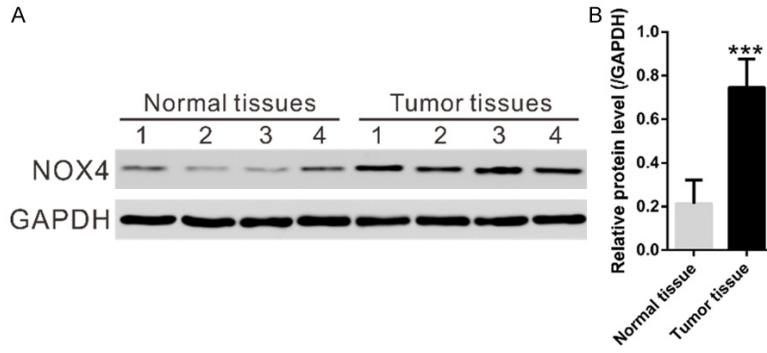

**Figure S1.** Western blot of NOX4 in GC specimens and paired noncancerous tissues. A: Representative Western blot images. B: Quantification of the western blot of 4 pairs of GC samples. NOX4 expression was normalized to GAPDH level.

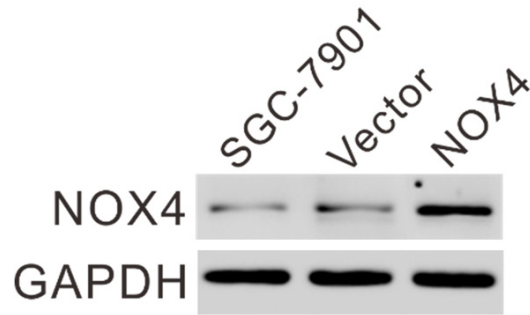

**Figure S2.** Expression of NOX4 in SGC-7901 cells was analyzed by Western blot. SGC-7901 cells were transfected with pcDNA3 (Vector) or pcDNA3-NOX4.
